# Supplementary material
Source: HighWire-hosted journal article supplement (https://openheart.bmj.com/content/5/2/e000842)
Supplement: inline-supplementary-material-1 [file inline-supplementary-material-1.docx]

| **Appendix 1. Medication before and after aortic valve surgery** | | | | | | | | |
| --- | --- | --- | --- | --- | --- | --- | --- | --- |
|  | **Before aortic valve surgery** | | | | **After aortic valve surgery** | | | |
| M**edication** | **AVR (n=19)** | **MIAVR (n=19)** | **P*-*value** | **Total (n=38)** | **AVR (n=19)** | **MIAVR (n=19)** | **P*-*value** | **Total (n=38)** |
| ASA | 8 (42.1%) | 11 (57.9%) | 0.43 | 19 (50.0%) | 10 (52.6%) | 13 (68.4%) | 0.58 | 23 (60.5%) |
| ACE inhibitors | 6 (31.6%) | 4 (21.0%) | 0.42 | 10 (26.3%) | 7 (36.8%) | 4 (21.1%) | 0.56 | 11 (28.9%) |
| ARB | 6 (31.6%) | 4 (21.0%) | 0.46 | 10 (26.3%) | 5 (26.3%) | 6 (31.6%) | 0.94 | 11 (28.9%) |
| Beta blocker | 6 (31.6%) | 10 (52.6%) | 0.30 | 16 (42.1%) | 12 (63.2%) | 14 (73.7%) | 0.76 | 26 (68.4%) |
| Calcium channel blocker | 5 (26.3%) | 3 (15.8%) | 0.53 | 8 (21.0%) | 5 (26.3%) | 3 (15.8%) | 0.73 | 8 (21.0%) |
| Diuretics | 5 (26.3%) | 3 (15.8%) | 0.40 | 8 (21.0%) | 8 (42.1%) | 5 (26.3%) | 0.58 | 13 (34.2%) |
| Insulin | 2 (10.5%) | 4 (21.0%) | 0.43 | 6 (15.8%) | 3 (15.8%) | 3 (15.8%) | 1.00 | 6 (15.8%) |
| Statins | 10 (52.6%) | 9 (47.4%) | 0.53 | 19 (50.0%) | 10 (52.6%) | 8 (42.1%) | 0.80 | 18 (47.4%) |
| ASA: acetyl salicylic acid; ACE: angiotensin converting enzyme; ARB: angiotensin receptor blocker | | | | | | | | |

| **Appendix 2. Perioperative data** | | | | |
| --- | --- | --- | --- | --- |
|  | **AVR** | **MIAVR** | **P*-*value** | **Total** |
| Cardio pulmonary bypass time (min) | 88.7 ± 28.2 | 113.4 ± 36 | 0.04 | 102 ± 35 |
| Aorta cross clamp time (min) | 70.7 ± 22 | 82.9 ± 26.9 | 0.72 | 77 ± 25 |
| **Valve type** |  |  |  |  |
| Biological prosthesis | 14 (73.7%) | 14 (73.7%) | 0.72 | 29 (72%) |
| Mechanical prosthesis | 5 (26.3%) | 5 (26.3.6%) | 0.72 | 10 (25%) |
| Sutureless | 0 | 7 (36.8%) | 0.003 | 7 (18.4%) |
| valve size (mm) | 23 ± 1.3 | 23 ± 1.7 | 0.07 | 23 ± 1.6 |
|  |  |  |  |  |
| De novo pacemaker | 1 (5.3%) | 0 | 0.40 | 1 (2.6%) |
| Tamponade | 1 (5.2%) | 2 (10.5%) | 0.62 | 3 (7.9%) |
| 30 days Mortality | 2 (10%) | 0 | 0.22 | 2 (5.2%) |
| AVR: aortic valve replacement; MIAVR: minimally invasive aortic valve replacement. | | | |  |
